# Supplementary material for: A Cd(ii)-based metal–organic framework as a luminance sensor to nitrobenzene and Tb(iii) ion
Source: Royal Society of Chemistry journal article supplement (doi:10.1039/c6dt00162a), 2016-01-01
Supplement: c6dt00162a1.pdf [file c6dt00162a1.pdf]

## Supporting Information

### Table of Contents

1. The PXRD patterns for Cd-MOF and Cd-MOF immersing in different solvents (Fig. S1).
2. The TGA curve of Cd-MOF (Fig. S2).
3. The solid state emission spectra of Cd-MOF and the free ligands (Fig. S3).
4. Emission spectra of Cd-MOF in different solvents ( $\lambda_{\text{ex}} = 318 \text{ nm}$ ) (Fig. S4).
5. Emission spectra of Cd-MOF dispersed in DMF with different concentrations of NB ( $\lambda_{\text{ex}} = 318 \text{ nm}$ ) (Fig. S5).
6. Emission spectra of Cd-MOF dispersed in DMF containing 4-nitrotoluene (A), 4-chloronitrobenzene (B), 4-nitroaniline (C) and 4-nitrophenol (D) ( $\lambda_{\text{ex}} = 318 \text{ nm}$ ) (Fig. S6).
7. The excitation spectra of Tb(III)@Cd-MOF/methanol (a), Tb(III)@Cd-MOF/aqueous (b),  $10^{-2}/3 \times 10^{-2} \text{ mol/L}$  Tb(III)/Eu(III)@Cd-MOF/methanol (c) ( $\lambda_{\text{em}}=545 \text{ nm}$ ) (Fig. S7).
8. Emission decay profiles of  $^5\text{D}_4$  Tb(III) in Tb(III)@Cd-MOF/methanol (a), Tb(III)@Cd-MOF/aqueous (b),  $10^{-2}/10^{-2} \text{ mol/L}$  Tb(III)/Eu(III)@Cd-MOF/methanol (c), and  $^5\text{D}_0$  Eu(III) in  $10^{-2}/10^{-2} \text{ mol/L}$  Tb(III)/Eu(III)@Cd-MOF/methanol (d) (Fig. S8).
9. Emission spectra of Tb(III)@Cd-MOF/aqueous with different concentrations of Tb(III)  $1 \times 10^{-2}$  (A),  $1 \times 10^{-3}$  (B),  $1 \times 10^{-4}$  (C), and  $1 \times 10^{-5}$  (D) mol/l,  $1 \times 10^{-2}$  Tb(III)/aqueous (E) and Cd-MOF/aqueous (F) ( $\lambda_{\text{ex}} = 366 \text{ nm}$ ). Inset, image under 365 nm UV-radiation for Tb(III)@Cd-MOF/aqueous (Fig. S9).
10. Emission spectra of Cd-MOF immersed in methanol solution containing rare earth metal ions (La(III), Pr(III), Nd(III), Er(III) and Yb(III),  $10^{-2} \text{ mol/L}$ ) ( $\lambda_{\text{ex}} = 318 \text{ nm}$ ) (Fig. S10).
11. Emission spectrum of  $10^{-2}/3 \times 10^{-2} \text{ mol/L}$  Tb(III)/Eu(III)@Cd-MOF/methanol ( $\lambda_{\text{ex}} = 366 \text{ nm}$ ) (Fig. S11).
12. The luminescence intensity of four recyclable experiments of sensing nitrobenzene (A) and Tb(III) ion (B) in methanol (Fig. S12).
13. Crystal data and structure refinement for Cd-MOF (Table S1).
14. Selected bond lengths [ $\text{\AA}$ ] and angles [ $^\circ$ ] for Cd-MOF (Table S2).

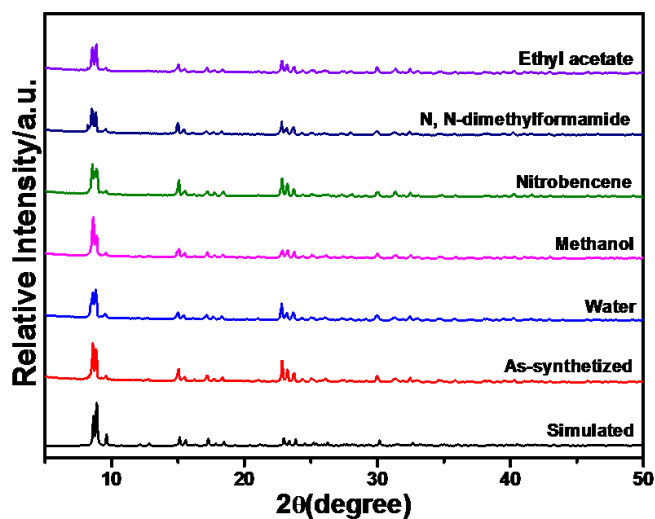

Fig. S1 PXRD patterns of Cd-MOF and Cd-MOF immersing in different solvents.

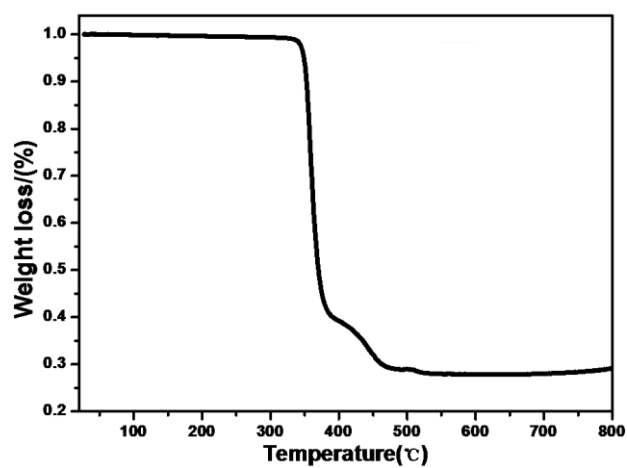

Fig. S2 The TGA curve of Cd-MOF.

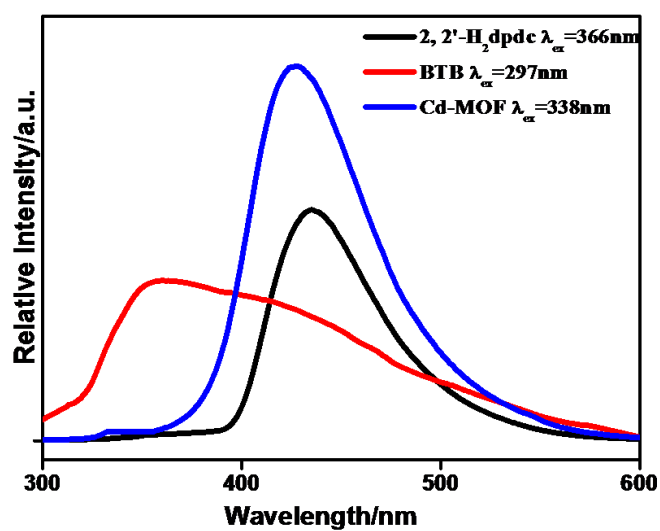

Fig. S3 The solid state emission spectra of Cd-MOF and the free ligands.

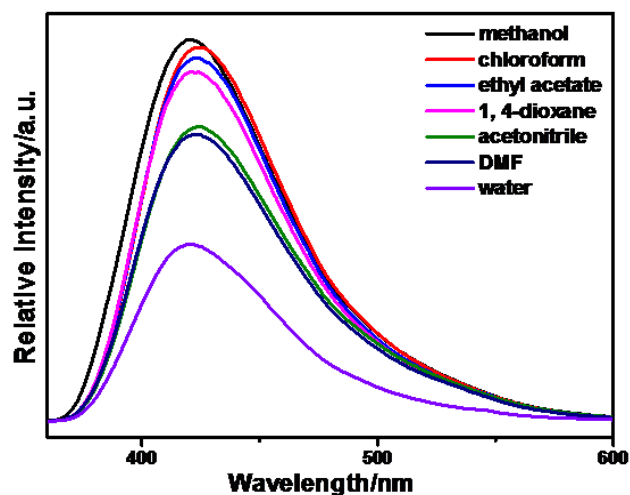

Fig. S4 Emission spectra of Cd-MOF in different solvents ( $\lambda_{\text{ex}} = 318 \text{ nm}$ ).

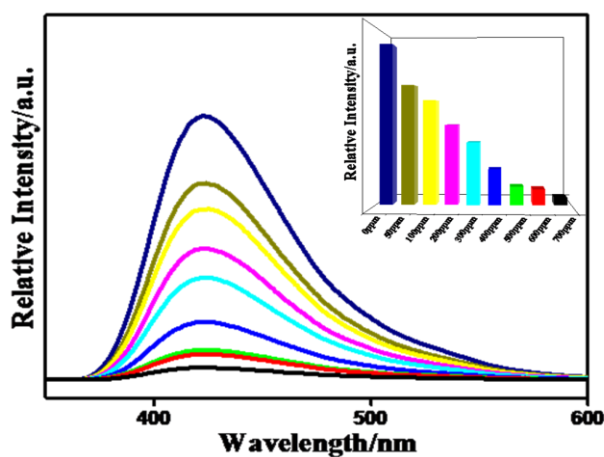

Fig. S5 Emission spectra of Cd-MOF dispersed in DMF with different concentrations of NB ( $\lambda_{\text{ex}} = 318 \text{ nm}$ ).

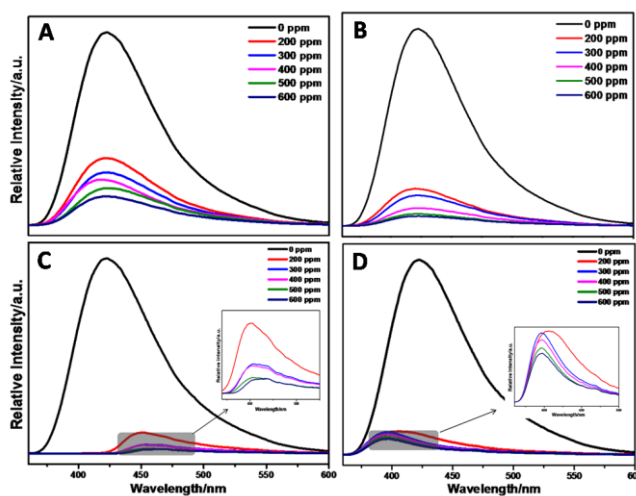

Fig. S6 Emission spectra of Cd-MOF dispersed in DMF containing 4-nitrotoluene (A), 4-chloronitrobenzene (B), 4-nitroaniline (C) and 4-nitrophenol (D) ( $\lambda_{\text{ex}} = 318 \text{ nm}$ ).

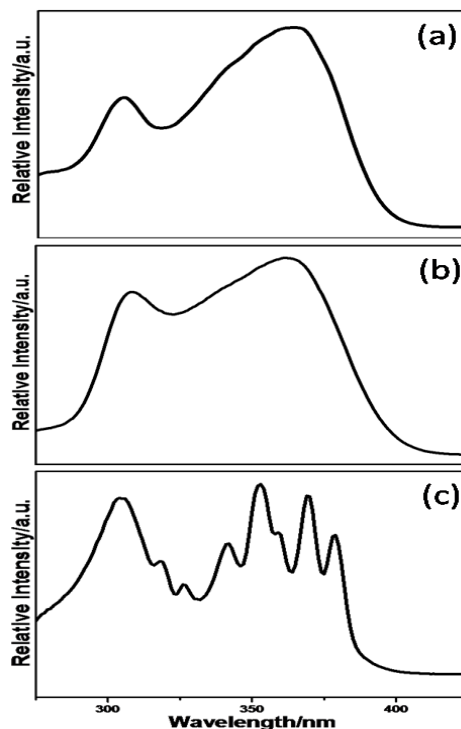

Fig. S7 The excitation spectra of Tb(III)@Cd-MOF/methanol (a), Tb(III)@Cd-MOF/aqueous (b),  $10^{-2}/3 \times 10^{-2}$  mol/L Tb(III)/Eu(III)@Cd-MOF/methanol (c) ( $\lambda_{em}=545$  nm).

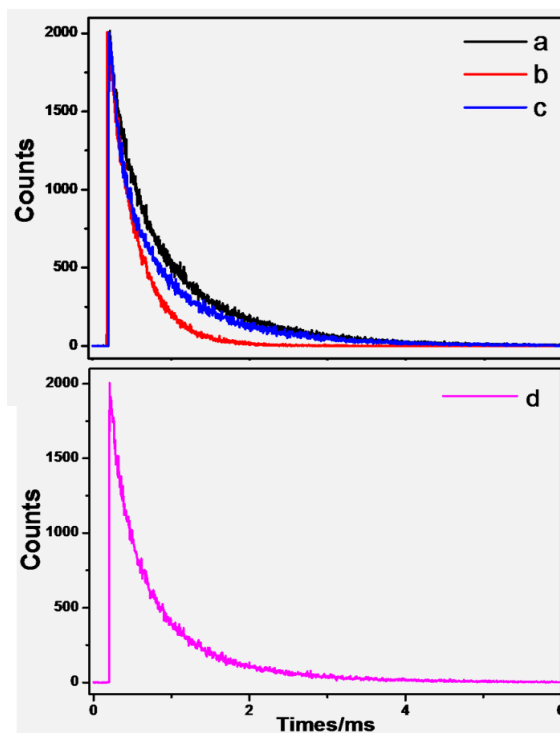

Fig. S8 Emission decay profiles of  $^5D_4$  Tb(III) in Tb(III)@Cd-MOF/methanol (a), Tb(III)@Cd-MOF/aqueous (b),  $10^{-2}/10^{-2}$  mol/L Tb(III)/Eu(III)@Cd-MOF/methanol (c), and  $^5D_0$  Eu(III) in  $10^{-2}/10^{-2}$  mol/L Tb(III)/Eu(III)@Cd-MOF/methanol (d).

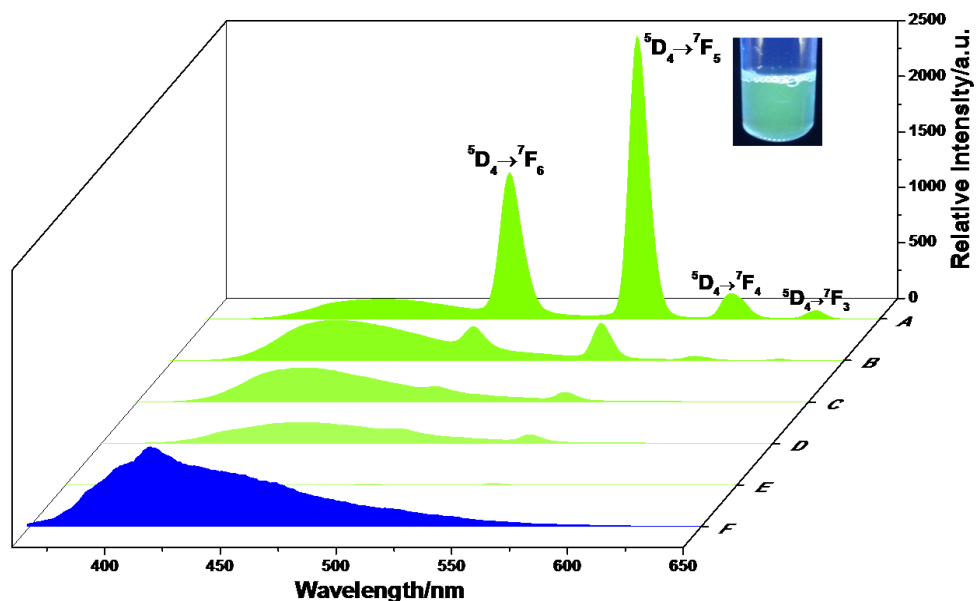

Fig. S9 Emission spectra of Tb(III)@Cd-MOF/aqueous with different concentrations of Tb(III)  $1 \times 10^{-2}$  (A),  $1 \times 10^{-3}$  (B),  $1 \times 10^{-4}$  (C), and  $1 \times 10^{-5}$  (D) mol/l,  $1 \times 10^{-2}$  Tb(III)/aqueous (E) and Cd-MOF/aqueous (F) ( $\lambda_{ex} = 366$  nm). Inset, image under 365 nm UV-radiation for Tb(III)@Cd-MOF/aqueous.

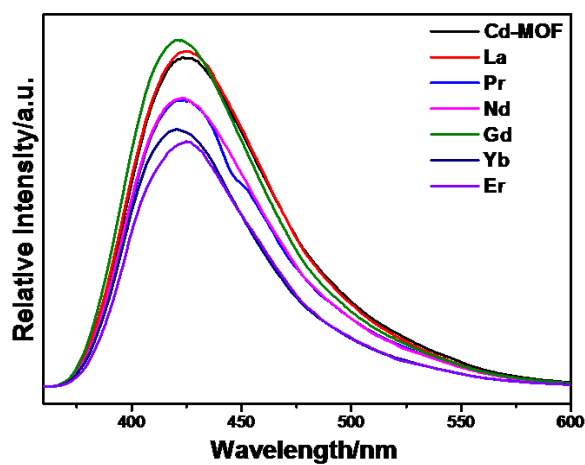

Fig. S10 Emission spectra of Cd-MOF immersed in methanol solution containing rare earth metal ions (La(III), Pr(III), Nd(III), Er(III) and Yb(III),  $10^{-2}$  mol/L) ( $\lambda_{ex} = 318$  nm).

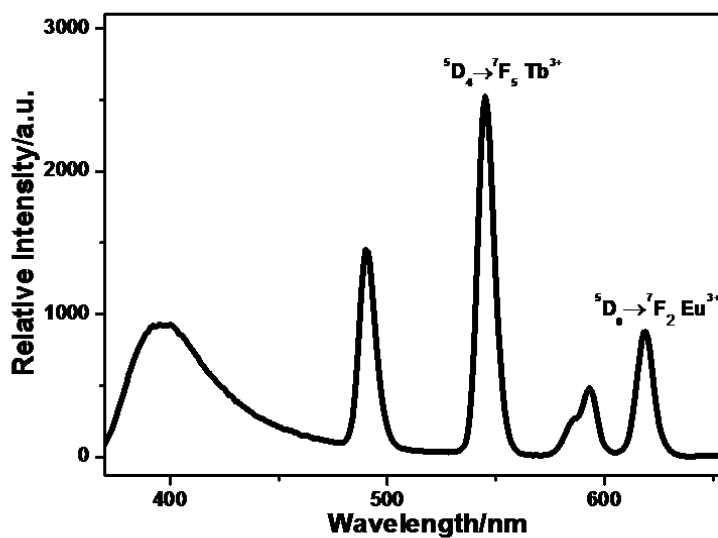

Fig. S11 Emission spectrum of  $10^{-2}/3 \times 10^{-2}$  mol/L Tb(III)/Eu(III)@Cd-MOF/methanol ( $\lambda_{ex} = 366$  nm).

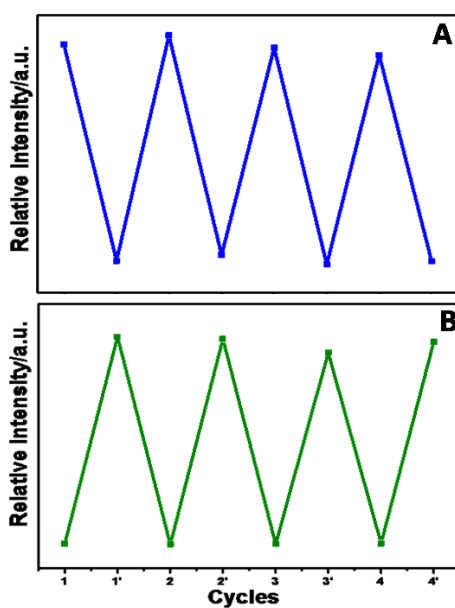

Fig. S12 The luminescence intensity of four recyclable experiments of sensing nitrobenzene (A) and Tb(III) ion (B) in methanol.

Table S1 Crystal data and structure refinement for Cd-MOF

| Complex                                             | Cd-MOF                                                                        |
|-----------------------------------------------------|-------------------------------------------------------------------------------|
| Empirical formula                                   | C <sub>36</sub> H <sub>28</sub> Cd <sub>2</sub> N <sub>6</sub> O <sub>8</sub> |
| Formula weight                                      | 897.44                                                                        |
| Crystal system                                      | hexagonal                                                                     |
| Space group                                         | <i>P6<sub>1</sub></i>                                                         |
| <i>a</i> / Å                                        | 11.823(2)                                                                     |
| <i>b</i> / Å                                        | 11.823(2)                                                                     |
| <i>c</i> / Å                                        | 41.384(8)                                                                     |
| $\gamma$ / (°)                                      | 120                                                                           |
| Volume / Å <sup>3</sup>                             | 5009.5(16)                                                                    |
| <i>Z</i>                                            | 6                                                                             |
| Calculated density / mg·m <sup>-3</sup>             | 1.785                                                                         |
| Absorption coefficient / mm <sup>-1</sup>           | 1.338                                                                         |
| <i>F</i> (000)                                      | 2676                                                                          |
| Crystal size / mm                                   | 0.40 × 0.20 × 0.20                                                            |
| $\theta$ Range for data collection / (°)            | 1.99-27.52                                                                    |
| Limiting indices                                    | -15 ≤ <i>h</i> ≤ 6<br>-14 ≤ <i>k</i> ≤ 15<br>-46 ≤ <i>l</i> ≤ 51              |
| Reflections collected / unique                      | 19935/7269<br>[ <i>R</i> (int)=0.0514]                                        |
| Data / restraints / parameters                      | 7269/175/524                                                                  |
| Goodness-of-fit on <i>F</i> <sup>2</sup>            | 0.984                                                                         |
| <i>R</i> <sub>1</sub> [ <i>I</i> > 2σ( <i>I</i> )]  | 0.0386                                                                        |
| <i>wR</i> <sub>2</sub> [ <i>I</i> > 2σ( <i>I</i> )] | 0.0531                                                                        |
| <i>R</i> <sub>1</sub> [all data]                    | 0.057                                                                         |
| <i>wR</i> <sub>2</sub> [all data]                   | 0.0578                                                                        |
| Largest diff. peak and hole / e·Å <sup>-3</sup>     | 0.462 and -0.393                                                              |

Table S2 Selected bond lengths [Å] and angles [°] for Cd-MOF

| Cd-MOF          |            |                 |           |
|-----------------|------------|-----------------|-----------|
| Cd(1)-O(1)      | 2.297(3)   | Cd(1)-O(5)      | 2.328(3)  |
| Cd(1)-O(3)      | 2.294(3)   | Cd(1)-O(7)      | 2.371(3)  |
| Cd(1)-N(6)#1    | 2.264(4)   | Cd(1)-N(1)      | 2.258(4)  |
| Cd(2)-O(3)#2    | 2.239(3)   | Cd(2)-O(7)      | 2.413(4)  |
| Cd(2)-O(6)#2    | 2.328(4)   | Cd(2)-O(8)      | 2.390(4)  |
| Cd(2)-O(1)      | 2.276(3)   | Cd(2)-O(5)#2    | 2.527(3)  |
| O(3)-Cd(1)-O(1) | 116.52(10) | O(3)-Cd(1)-O(5) | 76.91(11) |

|                     |            |                     |            |
|---------------------|------------|---------------------|------------|
| O(1)-Cd(1)-O(5)     | 166.04(11) | O(3)-Cd(1)-O(7)     | 164.61(12) |
| O(1)-Cd(1)-O(7)     | 75.09(11)  | O(5)-Cd(1)-O(7)     | 92.45(10)  |
| N(1)-Cd(1)-O(3)     | 100.54(12) | N(6)#1-Cd(1)-O(3)   | 84.07(13)  |
| N(1)-Cd(1)-O(1)     | 87.93(13)  | N(6)#1-Cd(1)-O(1)   | 92.92(13)  |
| N(1)-Cd(1)-O(5)     | 85.66(13)  | N(6)#1-Cd(1)-O(5)   | 92.28(14)  |
| N(1)-Cd(1)-O(7)     | 89.54(13)  | N(6)#1-Cd(1)-O(7)   | 85.30(14)  |
| N(1)-Cd(1)-N(6)#1   | 174.36(15) | O(8)-Cd(2)-O(7)     | 54.52(12)  |
| O(3)#2-Cd(2)-O(5)#2 | 73.91(11)  | O(1)-Cd(2)-O(5)#2   | 154.12(11) |
| O(6)#2-Cd(2)-O(5)#2 | 53.74(10)  | O(8)-Cd(2)-O(5)#2   | 82.68(11)  |
| O(7)-Cd(2)-O(5)#2   | 94.22(10)  | O(6)#2-Cd(2)-O(7)   | 89.28(13)  |
| O(3)#2-Cd(2)-O(1)   | 128.68(10) | O(3)#2-Cd(2)-O(6)#2 | 109.81(12) |
| O(1)-Cd(2)-O(6)#2   | 102.04(12) | O(3)#2-Cd(2)-O(8)   | 88.11(11)  |
| O(1)-Cd(2)-O(8)     | 107.82(12) | O(6)#2-Cd(2)-O(8)   | 122.13(12) |
| O(3)#2-Cd(2)-O(7)   | 142.28(12) | O(1)-Cd(2)-O(7)     | 74.64(11)  |

---

Symmetry transformations used to generate equivalent atoms: #1  $y-1, -x+y, z-1/6$ ; #2  $y, -x+y, z-1/6$ .
